# Supplementary material for: Interpersonal violence in posttraumatic women: brain networks triggered by trauma-related pictures
Source: PubMed Central journal article supplement — Soc Cogn Affect Neurosci. 2016 Dec 26;12(4):555–68. doi: 10.1093/scan/nsw165 (PMC5390702; doi:10.1093/scan/nsw165), 2016-12-26
Supplement: nsw165_supp.pdf [file nsw165_supp.pdf]

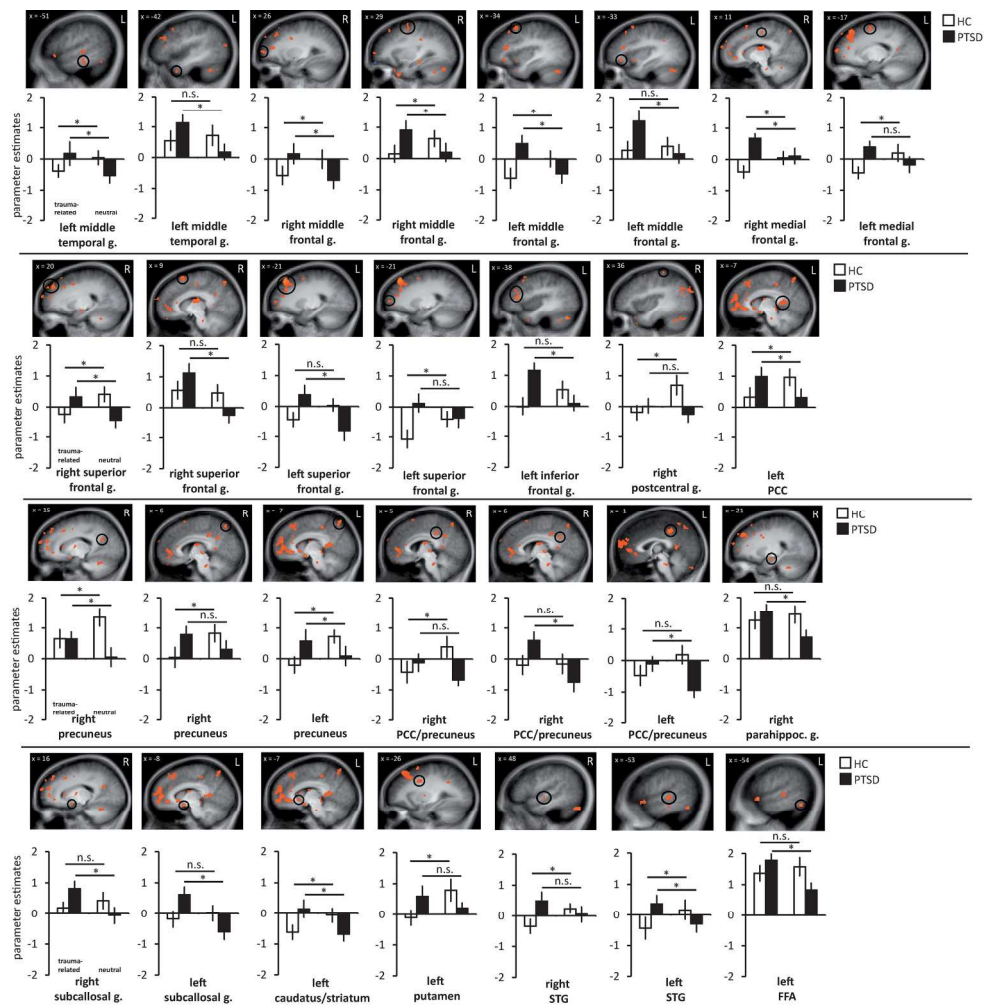

S-Figure 6. Estimated brain activation for trauma-related and neutral pictures in patients suffering from posttraumatic stress disorder (PTSD) and healthy controls (HC) in whole brain analysis (all  $P < .050$  corrected). Parameter estimates for HC are shown in white, for PTSD in black. g. = gyrus, PCC = posterior cingulate cortex, STG = superior temporal gyrus, FFA = fusiform face area, n. s. = not significant.

193x193mm (300 x 300 DPI)

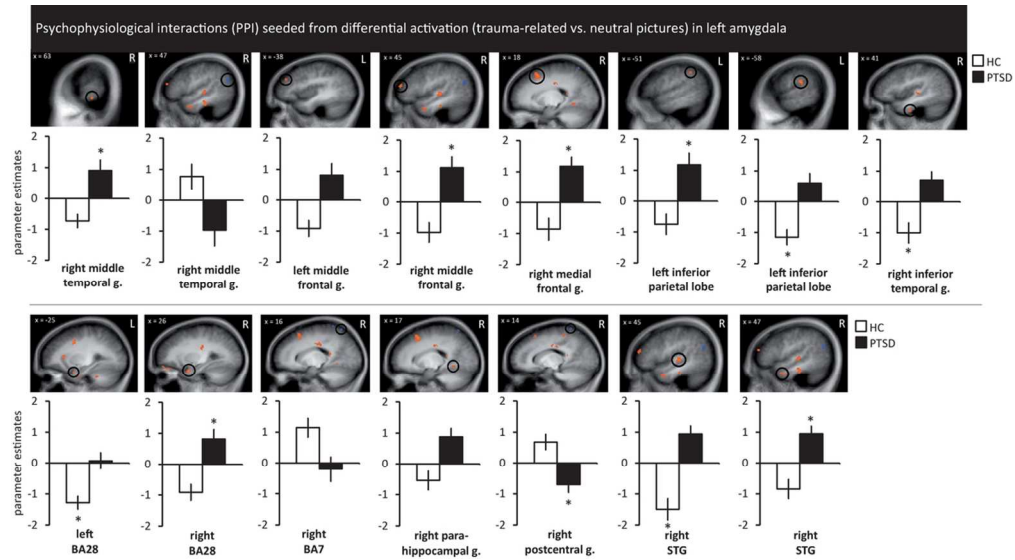

S-Figure 7. Whole brain analysis of psychophysiological interactions (PPI) seeded from differential activation (trauma-related vs. neutral pictures) in left amygdala (as shown in Figure 3). All  $P < .050$  corrected. g. = gyrus, STG = superior temporal gyrus, asterisks mark significance against baseline.

107x59mm (300 x 300 DPI)

S-Table 6. ROI-based parametric analysis of anxiety ratings: Significant hyperactivations for negativity of pictures for IPV-PTSD patients compared with healthy controls.

| Region            | Laterali-<br>zation | Talairach<br>coord. of<br>peak voxel |     |    | Cluster<br>size<br>(mm <sup>3</sup> ) | t-value<br>average | t-value<br>maximum |
|-------------------|---------------------|--------------------------------------|-----|----|---------------------------------------|--------------------|--------------------|
|                   |                     | x                                    | y   | z  |                                       |                    |                    |
| ACC/mPFC (dorsal) | L                   | -9                                   | 40  | 31 | 1460                                  | 3.32*              | 4.74               |
| ACC (dorsal)      | R                   | 2                                    | 14  | 24 | 32                                    | 3.03*              | 3.44               |
| Insula            | L                   | -28                                  | 4   | 17 | 209                                   | 3.05*              | 3.64               |
| Brainstem         | L                   | -5                                   | -21 | -5 | 64                                    | 3.16*              | 3.54               |

Note: ROI = region of interest; IPV-PTSD = interpersonal violence posttraumatic stress disorder; coord. = coordinates; L = left; R = right; ACC – anterior cingulate cortex; mPFC – medial prefrontal cortex;  $P \leq .005$  uncorrected, and  $P \leq .050$  corrected; \* - significant parametric modulation of picture negativity.

S-Table 7. Wholebrain analysis: Significant hyperactivations for trauma-related compared with neutral pictures for IPV-PTSD patients compared with healthy controls (HC).

| Region                 | Lateralization | Talairach coord. of peak voxel |     |     | Cluster size (mm <sup>3</sup> ) | t-value average | t-value maximum | t-value IPV-PTSD df <sub>(17)</sub> | t-value HC df <sub>(17)</sub> |
|------------------------|----------------|--------------------------------|-----|-----|---------------------------------|-----------------|-----------------|-------------------------------------|-------------------------------|
|                        |                | x                              | y   | z   |                                 |                 |                 |                                     |                               |
| Middle temporal Gyrus  | L              | -50                            | -25 | -11 | 136                             | 2.90*           | 3.30            | 2.31**                              | -2.76**                       |
| Middle temporal Gyrus  | L              | -43                            | 7   | -29 | 200                             | 2.94*           | 3.31            | 4.67**                              | -.51                          |
| Middle frontal Gyrus   | R              | 27                             | -3  | 60  | 296                             | 2.88*           | 3.26            | 2.15**                              | -2.16**                       |
| Middle frontal Gyrus   | R              | 28                             | 60  | 6   | 336                             | 3.00*           | 3.44            | 2.20**                              | -2.22**                       |
| Middle frontal Gyrus   | L              | -36                            | 11  | 52  | 776                             | 2.95*           | 3.46            | 2.73**                              | -2.16**                       |
| Middle frontal Gyrus   | L              | -32                            | 34  | -6  | 200                             | 3.03*           | 3.38            | 3.35**                              | -.51                          |
| Medial frontal Gyrus   | R              | 9                              | -12 | 49  | 104                             | 3.01*           | 3.39            | 2.26**                              | -2.32**                       |
| Medial frontal Gyrus   | L              | -17                            | 2   | 51  | 312                             | 3.13*           | 4.12            | 2.03                                | -2.70**                       |
| Superior frontal Gyrus | R              | 22                             | 43  | 35  | 1456                            | 3.00*           | 3.92            | 2.29**                              | -2.91**                       |
| Superior frontal Gyrus | R              | 10                             | 15  | 61  | 392                             | 2.98*           | 3.36            | 4.49**                              | .28                           |
| Superior frontal Gyrus | L              | -22                            | 35  | 47  | 4816                            | 3.18*           | 5.18            | 3.14**                              | -1.99                         |
| Superior frontal Gyrus | L              | -21                            | 56  | 6   | 184                             | 2.86*           | 3.09            | 1.73                                | -2.37**                       |
| Inferior frontal Gyrus | L              | -38                            | 27  | 13  | 936                             | 3.03*           | 3.82            | 3.64**                              | -1.92                         |
| Postcentral Gyrus      | R              | 38                             | -30 | 61  | 80                              | 2.99*           | 3.22            | .76                                 | -3.93**                       |
| PCC                    | L              | -7                             | -43 | 10  | 142                             | 3.04*           | 3.62            | 2.30**                              | -2.28**                       |
| Precuneus              | R              | 16                             | -56 | 25  | 166                             | 3.06*           | 3.52            | 2.58**                              | -2.63**                       |
| Precuneus              | R              | 8                              | -68 | 51  | 405                             | 3.02*           | 3.69            | 1.94                                | -2.76**                       |
| Precuneus              | L              | -8                             | -66 | 51  | 443                             | 3.15*           | 3.88            | 2.12**                              | -4.30**                       |
| PCC/Precuneus          | R              | 1                              | -36 | 38  | 304                             | 3.13*           | 4.04            | 1.62                                | -2.98**                       |
| PCC/Precuneus          | R              | 7                              | -50 | 29  | 288                             | 2.99*           | 3.65            | 4.05**                              | -.10                          |
| PCC/Precuneus          | L              | -1                             | -36 | 39  | 416                             | 3.32*           | 4.10            | 2.88**                              | -2.05                         |
| Parahippocampal Gyrus  | R              | 22                             | -12 | -12 | 232                             | 3.14*           | 3.86            | 3.96**                              | -.74                          |
| Subcallosal Gyrus      | R              | 18                             | 6   | -11 | 96                              | 2.87*           | 3.10            | 3.09**                              | -.84                          |
| Subcallosal Gyrus      | L              | -9                             | 4   | -9  | 224                             | 3.17*           | 3.91            | 4.10**                              | -.54                          |
| Caudatus/Striatum      | L              | -7                             | 14  | -1  | 344                             | 3.11*           | 3.70            | 2.57**                              | -2.24**                       |

|                         |   |     |     |     |     |       |      |        |         |
|-------------------------|---|-----|-----|-----|-----|-------|------|--------|---------|
| Putamen                 | L | -27 | 5   | 32  | 272 | 2.96* | 3.38 | 1.07   | -4.22** |
| Superior temporal Gyrus | R | 49  | -8  | 1   | 88  | 2.82* | 2.96 | 1.72   | -2.24** |
| Superior temporal Gyrus | L | -53 | -22 | 3   | 344 | 2.97* | 3.57 | 2.30** | -2.41** |
| FFA                     | L | -54 | -54 | -13 | 192 | 3.22* | 4.04 | 3.21** | -.95    |

Note: IPV-PTSD = interpersonal violence posttraumatic stress disorder; HC = healthy controls; coord. = coordinates; L = left; R = right; PCC – posterior cingulate cortex; FFA – fusiform face area;  $P \leq .005$  uncorrected, and  $P \leq .050$  corrected; \* - significant interaction; \*\* - significant planned comparisons.

S-Table 8. PPI wholebrain analysis: Significant differences in connectivity patterns for the contrast trauma-related > neutral scenes in IPV-PTSD patients versus HC.

| Seed Region             | PPI Region              | Lateralization of finding | Talairach coord. of peak voxel |     |     | Cluster size (mm <sup>3</sup> ) | <i>t</i> -value average | <i>t</i> -value maximum | <i>t</i> -value PTSD df <sub>(17)</sub> | <i>t</i> -value HC df <sub>(17)</sub> |
|-------------------------|-------------------------|---------------------------|--------------------------------|-----|-----|---------------------------------|-------------------------|-------------------------|-----------------------------------------|---------------------------------------|
|                         |                         |                           | x                              | y   | z   |                                 |                         |                         |                                         |                                       |
| PTSD patients > HC      |                         |                           |                                |     |     |                                 |                         |                         |                                         |                                       |
| Amygdala (left) BLA     | Middle temporal Gyrus   | R                         | 63                             | -26 | -12 | 128                             | 3.06*                   | 3.74                    | 2.73**                                  | -1.97                                 |
|                         | Middle frontal Gyrus    | L                         | -39                            | 40  | 29  | 72                              | 2.86*                   | 2.98                    | 1.98                                    | -1.92                                 |
|                         | Middle frontal Gyrus    | R                         | 46                             | 44  | 16  | 144                             | 2.97*                   | 3.27                    | 2.61**                                  | -1.67                                 |
|                         | Medial frontal Gyrus    | R                         | 17                             | 16  | 47  | 608                             | 3.21*                   | 4.12                    | 2.90**                                  | -2.37                                 |
|                         | Inferior parietal Lobe  | L                         | -51                            | -42 | 39  | 88                              | 2.96*                   | 3.18                    | 2.66**                                  | -1.41                                 |
|                         | Inferior parietal Lobe  | L                         | -59                            | -28 | 22  | 272                             | 3.13*                   | 3.95                    | 1.78                                    | -2.96**                               |
|                         | Inferior temporal Gyrus | R                         | 42                             | -8  | -31 | 96                              | 2.98*                   | 3.58                    | 2.23                                    | -2.59**                               |
|                         | BA28                    | L                         | -22                            | 4   | -20 | 104                             | 3.02*                   | 3.52                    | .26                                     | -3.25**                               |
|                         | BA28                    | R                         | 25                             | 5   | -22 | 176                             | 3.31*                   | 4.48                    | 2.51**                                  | -2.07                                 |
|                         | Parahippocampal Gyrus   | R                         | 17                             | -50 | -4  | 72                              | 2.86*                   | 3.11                    | 2.29                                    | -1.38                                 |
|                         | Superior temporal Gyrus | R                         | 45                             | -22 | 4   | 656                             | 3.07*                   | 4.01                    | 2.12                                    | -3.53**                               |
| Superior temporal Gyrus | R                       | 46                        | 8                              | -21 | 128 | 2.87*                           | 3.11                    | 2.58**                  | -1.70                                   |                                       |
| HC > PTSD patients      |                         |                           |                                |     |     |                                 |                         |                         |                                         |                                       |
| Amygdala (left) BLA     | Middle temporal Gyrus   | R                         | 47                             | -65 | 25  | 304                             | -2.97*                  | -3.37                   | -2.39                                   | 2.00                                  |
|                         | BA7                     | R                         | 15                             | -60 | 61  | 72                              | -3.07*                  | -3.53                   | -.72                                    | 2.99**                                |
|                         | Postcentral Gyrus       | R                         | 13                             | -46 | 66  | 72                              | -2.87*                  | -3.12                   | -2.51**                                 | 1.48                                  |

Note: PPI = psychophysiological interaction; IPV-PTSD = interpersonal violence posttraumatic stress disorder; HC = healthy controls; coord. = coordinates; L = left; R = right; BLA = basolateral nucleus;  $P \leq .005$  uncorrected, and  $P \leq .050$  corrected; \* - significant interaction; \*\* - significant planned comparisons.

S-Table 9. Wholebrain analysis: Significant activations for trauma-related compared with neutral pictures.

| Region                  | Laterali-<br>zation | Talairach coord. of<br>peak voxel |     |     | Cluster<br>size<br>(mm <sup>3</sup> ) | t-value<br>average | t-value<br>maximum |
|-------------------------|---------------------|-----------------------------------|-----|-----|---------------------------------------|--------------------|--------------------|
|                         |                     | x                                 | y   | z   |                                       |                    |                    |
| Amygdala                | R                   | 17                                | -5  | -11 | 736                                   | 3.38*              | 4.38               |
| Middle temporal Gyrus   | R                   | 47                                | 6   | -38 | 1176                                  | 3.24*              | 4.89               |
| Middle frontal Gyrus    | L                   | -34                               | 12  | 45  | 216                                   | 2.87*              | 3.19               |
| Superior frontal Gyrus  | L                   | -3                                | 22  | 48  | 968                                   | 3.20*              | 4.15               |
| Superior frontal Gyrus  | R                   | 5                                 | 12  | 59  | 1021                                  | 3.06*              | 3.74               |
| Inferior frontal Gyrus  | R                   | 56                                | 31  | 9   | 25248                                 | 3.63*              | 6.53               |
| mPFC (dorsal)           | L                   | 3                                 | 42  | 37  | 5613                                  | 3.42*              | 5.10               |
| mPFC (dorsal)           | R                   | 4                                 | 42  | 37  | 2459                                  | 3.37*              | 5.10               |
| mPFC (ventral)          | L                   | -2                                | 36  | -11 | 3471                                  | 3.34*              | 4.33               |
| mPFC (ventral)          | R                   | 8                                 | 56  | -7  | 1743                                  | 3.24*              | 4.12               |
| mPFC (dorsal)           | L                   | -7                                | 28  | 30  | 224                                   | 2.86*              | 3.21               |
| ACC (dorsal)            | L                   | 1                                 | -12 | 35  | 784                                   | 3.18*              | 4.07               |
| ACC (dorsal)            | R                   | 3                                 | 18  | 25  | 424                                   | 3.05*              | 3.83               |
| Supramarginal Gyrus     | L                   | -37                               | -36 | 32  | 728                                   | 3.23*              | 4.44               |
| Superior parietal lobe  | L                   | -30                               | -52 | 49  | 216                                   | 3.00*              | 3.48               |
| Parahippocampal Gyrus   | L                   | -34                               | -14 | -20 | 352                                   | 3.14*              | 3.96               |
| Parahippocampal Gyrus   | L                   | -28                               | 5   | -18 | 24400                                 | 3.49*              | 7.06               |
| Caudatus                | L                   | -35                               | -32 | -1  | 328                                   | -3.46*             | -4.81              |
| Caudatus                | R                   | 11                                | 10  | 4   | 840                                   | 3.19*              | 4.39               |
| Precuneus               | R                   | 2                                 | -54 | 32  | 200                                   | 2.91*              | 3.16               |
| BA18                    | L                   | -2                                | -92 | 8   | 696                                   | -2.96*             | -3.53              |
| BA18                    | L                   | -15                               | -80 | -2  | 272                                   | -3.06*             | -3.51              |
| BA18                    | R                   | 12                                | -86 | -4  | 2104                                  | -3.09*             | -4.11              |
| Middle occipital Gyrus  | L                   | -50                               | -69 | 7   | 34400                                 | 4.34*              | 8.83               |
| Middle occipital Gyrus  | R                   | 43                                | -71 | 5   | 38024                                 | 4.34*              | 8.05               |
| Superior temporal Gyrus | R                   | 54                                | -9  | -7  | 288                                   | 2.91*              | 3.24               |

Note: coord. = coordinates; L = left; R = right; ACC – anterior cingulate cortex; mPFC – medial prefrontal cortex;  $P \leq .005$  uncorrected, and  $P \leq .050$  corrected; \* - significant  $t$ -value.



S-Table 10. Wholebrain analysis: Significant activations for IPV-PTSD patients compared with healthy controls.

| Region                   | Laterali-<br>zation | Talairach coord. of<br>peak voxel |     |     | Cluster<br>size<br>(mm <sup>3</sup> ) | t-value<br>average | t-value<br>maximum |
|--------------------------|---------------------|-----------------------------------|-----|-----|---------------------------------------|--------------------|--------------------|
|                          |                     | x                                 | y   | z   |                                       |                    |                    |
| Middle temporal Gyrus    | R                   | 49                                | 1   | -19 | 144                                   | 3.02*              | 3.55               |
| Middle frontal Gyrus     | R                   | 40                                | -3  | 54  | 408                                   | -3.02*             | -3.55              |
| Medial frontal Gyrus     | L                   | -4                                | 2   | 48  | 352                                   | -3.09*             | -3.83              |
| Superior temporal Gyrus  | L                   | -53                               | -54 | 9   | 272                                   | -2.96*             | -3.30              |
| Superior temporal Gyrus  | R                   | 41                                | -56 | 16  | 136                                   | -2.84*             | -2.99              |
| Middle temporal Gyrus    | L                   | -29                               | -68 | 19  | 1736                                  | -3.02*             | -3.76              |
| BA6                      | L                   | -18                               | 8   | 57  | 152                                   | 2.95*              | 3.32               |
| Supramarginal Gyrus      | L                   | -67                               | -46 | 24  | 408                                   | -3.01*             | -4.30              |
| ACC (ventral)            | R                   | 12                                | 46  | -6  | 112                                   | 3.00*              | 3.31               |
| Inferior frontal Gyrus   | R                   | 45                                | 35  | -2  | 328                                   | 3.17*              | 3.80               |
| Inferior frontal Gyrus   | R                   | 29                                | 28  | -12 | 424                                   | 3.02*              | 3.42               |
| Parahippocampal Gyrus    | L                   | -22                               | -25 | -20 | 448                                   | -3.08*             | -3.70              |
| Precuneus                | R                   | 4                                 | -36 | 44  | 520                                   | -3.00*             | -3.55              |
| Caudatus                 | R                   | 5                                 | 7   | -3  | 144                                   | 3.01*              | 3.57               |
| Thalamus                 | R                   | 17                                | -24 | 13  | 104                                   | -3.24*             | -4.09              |
| Brainstem                | R                   | 11                                | -21 | -15 | 192                                   | -3.09*             | -3.74              |
| Occipital Gyrus (Cuneus) | L                   | -15                               | -91 | 30  | 360                                   | -2.98*             | -3.38              |
| BA18                     | L                   | -19                               | -54 | 5   | 200                                   | -2.99*             | -3.42              |
| Occipital Gyrus          | L                   | -18                               | -91 | 1   | 416                                   | -3.10*             | -3.82              |
| Occipital Gyrus          | R                   | 11                                | -82 | -4  | 928                                   | -3.25*             | -4.27              |
| Occipital Gyrus          | R                   | 21                                | -86 | 14  | 264                                   | -2.97*             | -3.47              |
| Superior temporal Gyrus  | R                   | 46                                | 10  | -16 | 96                                    | 3.02*              | 3.42               |
| Superior temporal Gyrus  | R                   | 38                                | -51 | 15  | 104                                   | -2.84*             | -3.03              |

Note: coord. = coordinates; L = left; R = right; ACC – anterior cingulate cortex;  $P \leq .005$  uncorrected, and  $P \leq .050$  corrected; \* - significant  $t$ -value.
